# Supplementary material for: The Parasite-Derived Peptide, FhHDM-1, Selectively Modulates miRNA Expression in β-Cells to Prevent Apoptotic Pathways Induced by Proinflammatory Cytokines
Source: PubMed Central journal article supplement (PMC11254460; doi:10.1155/2024/8555211), 2024-07-10
Supplement: 8555211.f1.pdf [file 8555211.f1.pdf]

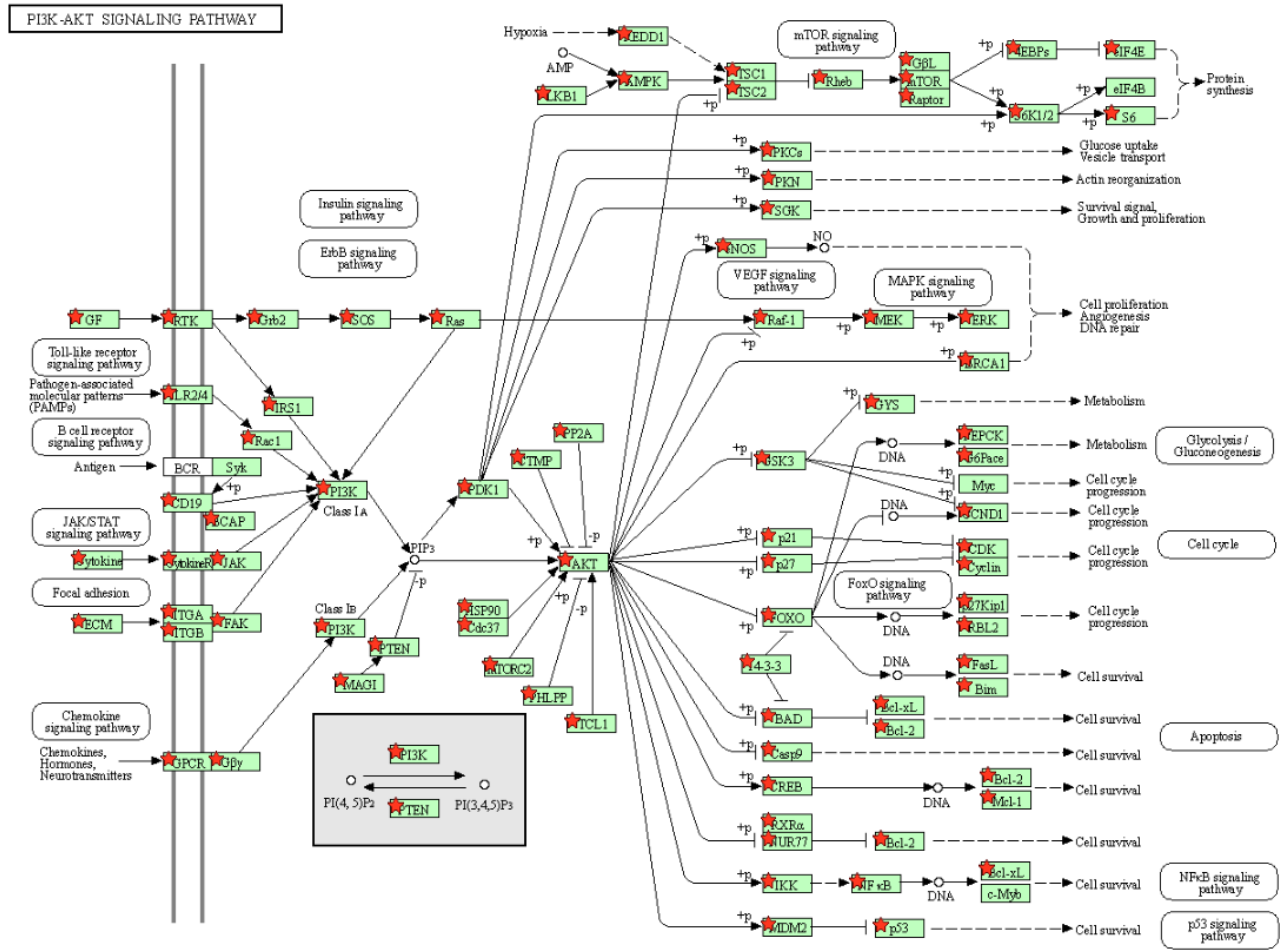

**Supplementary Figure 1. The (downregulated) gene targets of upregulated miRNA impacted within the PI3K/Akt pathway determined by DAVID (v6.8) functional annotation analysis tool. Expression changes observed within FhHDM-1 treated  $\beta$ -cells under inflammatory conditions compared to controls treated with pro-inflammatory cytokines only. Activated genes are indicated by the red stars.**

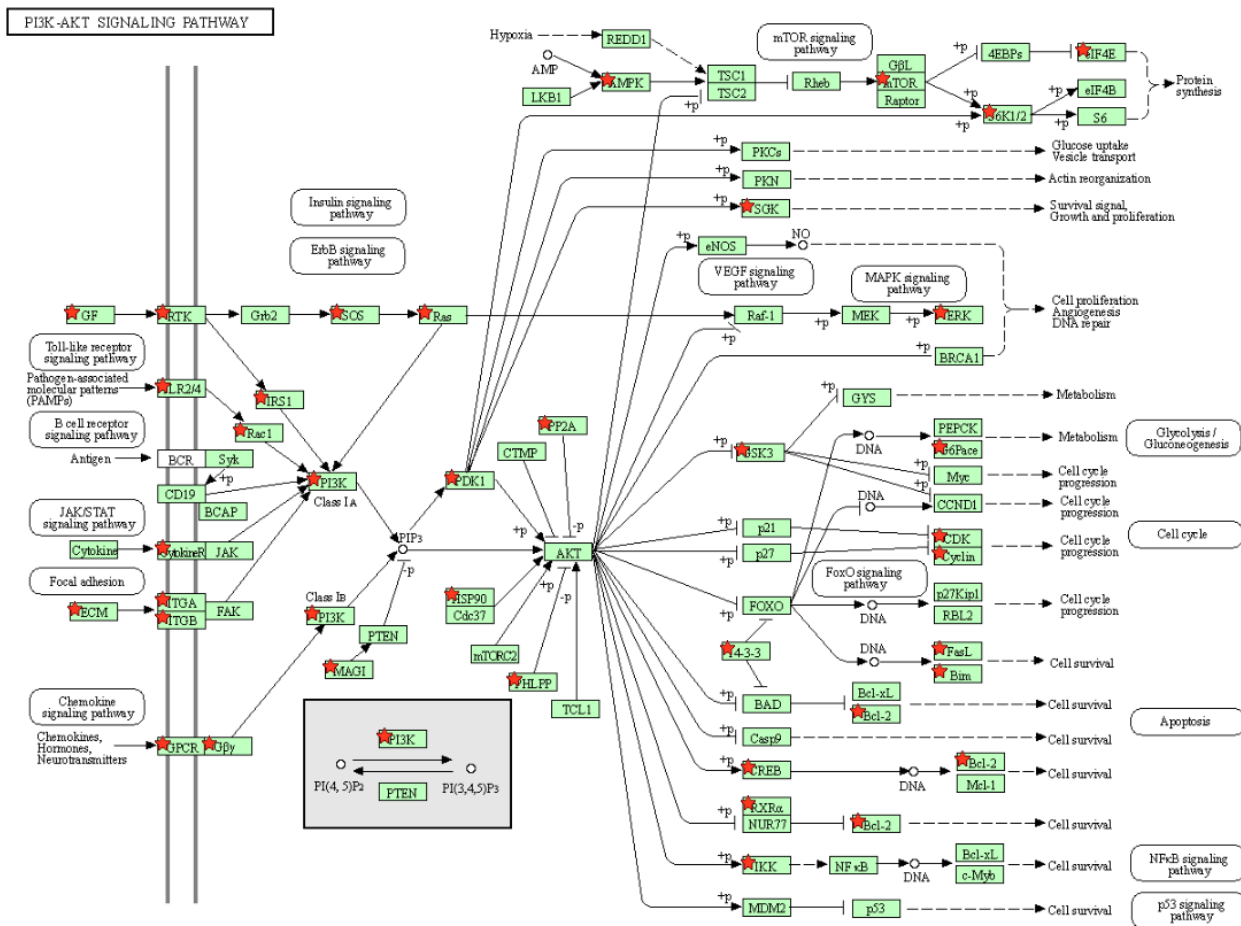

**Supplementary Figure 2. The (upregulated) gene targets of downregulated miRNAs impacted within the PI3K/Akt pathway as determined using DAVID (v6.8) functional annotation analysis tool.** Gene expression level changes observed within FhHDM-1 treated  $\beta$ -cells under inflammatory conditions as compared to control NIT-1  $\beta$ -cells treated with pro-inflammatory cytokines only. Genes deemed to be increased in expression are indicated by the red stars
